# Supplementary material for: Neuroimaging features of antiphospholipid antibody-related stroke compared with atrial fibrillation-related stroke
Source: PubMed Central journal article supplement (PMC9270426; doi:10.1038/s41598-022-16019-3), 2022-07-08
Supplement: 41598_2022_16019_MOESM1_ESM.pdf [file 41598_2022_16019_MOESM1_ESM.pdf]

ONLINE SUPPLEMENTAL MATERIAL:

**Neuroimaging features of antiphospholipid antibody-related stroke compared with atrial fibrillation-related stroke**

Wookjin Yang, MD, MSc<sup>1,2</sup>; Dong-Wan Kang, MD, MSc<sup>1,2</sup>; Jeong-Min Kim, MD, PhD<sup>1</sup>;  
Keun-Hwa Jung, MD, PhD<sup>1</sup>; Seung-Hoon Lee, MD, PhD, FAHA<sup>1,2,3</sup>

<sup>1</sup> Department of Neurology, Seoul National University Hospital, Seoul, Korea

<sup>2</sup> Korean Cerebrovascular Research Institute, Seoul, Korea

<sup>3</sup> Cenyx Biotech Inc., Seoul, Korea

**Table S1. Baseline clinical characteristics of the definite APS-stroke, aPL-stroke, and AF-stroke groups**

|                                        | <b>Definite APS-stroke (n=21)</b> | <b>aPL-stroke (n=56)</b> | <b>AF-stroke (n=333)</b> | <b><i>p</i>1</b> | <b><i>p</i>2</b> |
|----------------------------------------|-----------------------------------|--------------------------|--------------------------|------------------|------------------|
| Age, years                             | 56 [45; 64]                       | 61 [48; 68]              | 76 [68; 81]              | 0.14             | <0.001           |
| Sex, male                              | 9 (42.9)                          | 27 (48.2)                | 189 (56.8)               | 0.87             | 0.31             |
| Body mass index, kg/m <sup>2</sup>     | 23.4±3.4                          | 23.7±3.5                 | 23.3±3.4                 | 0.74             | 0.98             |
| Hypertension                           | 13 (61.9)                         | 39 (69.6)                | 239 (71.8)               | 0.71             | 0.47             |
| Diabetes                               | 4 (19.0)                          | 12 (21.4)                | 111 (33.3)               | >0.99            | 0.27             |
| Hyperlipidemia                         | 8 (38.1)                          | 25 (44.6)                | 131 (39.3)               | 0.80             | >0.99            |
| Previous stroke                        | 1 (4.8)                           | 4 (7.1)                  | 66 (19.8)                | >0.99            | 0.15             |
| Ever smoker                            | 11 (52.4)                         | 25 (44.6)                | 93 (27.9)                | 0.73             | 0.032            |
| Previous medication                    |                                   |                          |                          |                  |                  |
| Antiplatelet                           | 4 (19.0)                          | 11 (19.6)                | 132 (39.8)               | >0.99            | 0.097            |
| Anticoagulant                          | 1 (4.8)                           | 3 (5.4)                  | 65 (19.5)                | >0.99            | 0.14             |
| Neurologic status                      |                                   |                          |                          |                  |                  |
| Initial NIHSS score                    | 2 [1; 4]                          | 3 [1; 5.5]               | 5 [2; 14]                | 0.40             | 0.005            |
| Discharge NIHSS score                  | 2 [0; 3]                          | 1 [0; 4]                 | 2 [1; 8]                 | 0.73             | 0.047            |
| Discharge mRS                          | 1 [0; 2]                          | 1 [1; 2]                 | 2 [1; 4]                 | 0.38             | 0.005            |
| Intravenous thrombolysis               | 0 (0.0)                           | 3 (5.4)                  | 52 (15.6)                | 0.56             | 0.054            |
| Endovascular treatment                 | 0 (0.0)                           | 3 (5.4)                  | 63 (18.9)                | 0.56             | 0.033            |
| White blood cells, ×10 <sup>9</sup> /L | 7.690 [6.090; 9.270]              | 8.425 [6.040; 10.875]    | 7.480 [6.250; 9.410]     | 0.48             | 0.93             |

|                            |                    |                    |                    |       |        |
|----------------------------|--------------------|--------------------|--------------------|-------|--------|
| Hematocrit, %              | 40.5 [34.9; 45.1]  | 40.6 [36.4; 45.0]  | 40.0 [35.9; 44.4]  | 0.94  | 0.74   |
| Platelets, $\times 10^9/L$ | 234 [207; 276]     | 234 [195.5; 268.5] | 201 [167; 233]     | 0.75  | 0.007  |
| Creatinine, mg/dL          | 0.82 [0.70; 0.99]  | 0.86 [0.70; 0.99]  | 0.90 [0.74; 1.12]  | 0.95  | 0.22   |
| Fasting glucose, mg/dL     | 99 [90; 111]       | 97.5 [85; 106]     | 100 [87; 124]      | 0.44  | 0.60   |
| LDL cholesterol, mg/dL     | 118 [100; 139]     | 118 [87.5; 152]    | 96.5 [71; 125]     | >0.99 | 0.030  |
| PT-INR                     | 0.98 [0.92; 1.01]  | 0.97 [0.94; 1.01]  | 1.03 [0.97; 1.11]  | 0.84  | 0.007  |
| Fibrinogen, mg/dL          | 331 [262; 378]     | 334 [293; 384]     | 320 [280; 372]     | 0.35  | 0.75   |
| hsCRP, mg/dL               | 0.14 [0.08; 0.47]  | 0.15 [0.10; 0.56]  | 0.23 [0.08; 0.81]  | 0.52  | 0.23   |
| LVIDd, cm                  | 4.8 [4.6; 5.1]     | 4.7 [4.5; 5.0]     | 4.7 [4.4; 5.0]     | 0.20  | 0.069  |
| LVIDs, cm                  | 3.0 [2.9; 3.2]     | 2.9 [2.7; 3.1]     | 3.0 [2.7; 3.2]     | 0.26  | 0.37   |
| IVSd, cm                   | 0.9 [0.9; 1.0]     | 0.9 [0.8; 1.0]     | 1.0 [0.9; 1.1]     | 0.68  | 0.33   |
| LVPWd, cm                  | 0.9 [0.9; 1.0]     | 0.9 [0.9; 1.0]     | 1.0 [0.9; 1.0]     | 0.32  | 0.89   |
| LV mass index, $g/m^2$     | 92.5 [86.2; 106.8] | 89.0 [77.6; 106.2] | 93.4 [78.6; 109.0] | 0.37  | 0.73   |
| LV ejection fraction, %    | 60.5 [57; 63]      | 61 [57.5; 65]      | 60 [56; 64]        | 0.45  | 0.92   |
| LA size, mm                | 37.5 [35; 43]      | 39 [35; 43]        | 49 [43; 53]        | 0.76  | <0.001 |
| Subclinical valve lesion   | 1 (4.8)            | 8 (14.3)           | 67 (20.1)          | 0.43  | 0.093  |

The data are expressed as numbers (%), mean  $\pm$  standard deviation, or median [interquartile range].

$p_1$ ,  $p$ -value between definite APS-stroke and aPL-stroke;  $p_2$ ,  $p$ -value between definite APS-stroke and AF-stroke.

Abbreviations: AF-stroke, atrial fibrillation-related stroke; aPL-stroke, antiphospholipid antibody-related stroke; APS-stroke, antiphospholipid syndrome-related stroke; hsCRP, high-sensitivity C-reactive protein; IVSd, interventricular septal thickness at end-diastole; LDL, low-density lipoprotein; LV, left ventricular; LVIDd, left ventricular internal diameter at end-diastole; LVIDs, left ventricular internal diameter at end-systole; LVPWd, left ventricular posterior wall thickness at end-diastole; mRS, modified Rankin Scale; NIHSS, National Institutes of Health Stroke Scale; PT-INR, prothrombin time-international normalized ratio.

**Table S2. Imaging characteristics of the definite APS-stroke, aPL-stroke, and AF-stroke groups**

|                                             | <b>Definite APS-stroke (n=21)</b> | <b>aPL-stroke (n=56)</b> | <b>AF-stroke (n=333)</b> | <b><i>p</i>1</b> | <b><i>p</i>2</b> |
|---------------------------------------------|-----------------------------------|--------------------------|--------------------------|------------------|------------------|
| DWI lesion pattern                          |                                   |                          |                          |                  |                  |
| Single small lesion                         | 6 (28.6)                          | 17 (30.4)                | 25 (7.5)                 | >0.99            | 0.006            |
| Small scattered lesions in single territory | 4 (19.0)                          | 8 (14.3)                 | 44 (13.2)                | 0.73             | 0.51             |
| Large territorial lesion                    | 7 (33.3)                          | 15 (26.8)                | 188 (56.5)               | 0.78             | 0.066            |
| Multi-territory lesions                     | 4 (19.0)                          | 16 (28.6)                | 76 (22.8)                | 0.58             | 0.80             |
| Relevant artery occlusion                   | 3 (14.3)                          | 10 (17.9)                | 182 (54.7)               | >0.99            | 0.001            |
| Intracranial branching vessels              | 2 (9.5)                           | 3 (5.4)                  | 73 (21.9)                | 0.61             | 0.27             |
| Intracranial main vessels                   | 1 (4.8)                           | 6 (10.7)                 | 96 (28.8)                | 0.67             | 0.032            |
| Extracranial large vessels                  | 0 (0.0)                           | 1 (1.8)                  | 13 (3.9)                 | >0.99            | >0.99            |
| Total DWI lesion volume, mL                 | 1.6 [0.5; 9.5]                    | 1.6 [0.5; 9.4]           | 11.3 [2.8; 33.1]         | 0.89             | 0.003            |

The data are expressed as numbers (%) or median [interquartile range].

*p*1, *p*-value between definite APS-stroke and aPL-stroke; *p*2, *p*-value between definite APS-stroke and AF-stroke.

Abbreviations: AF-stroke, atrial fibrillation-related stroke; aPL-stroke, antiphospholipid antibody-related stroke; APS-stroke, antiphospholipid syndrome-related stroke; DWI, diffusion-weighted imaging.

**Figure S1. Diffusion-weighted imaging lesion pattern and total lesion volume of definite APS-stroke and AF-stroke patients with a multi-territory lesion**

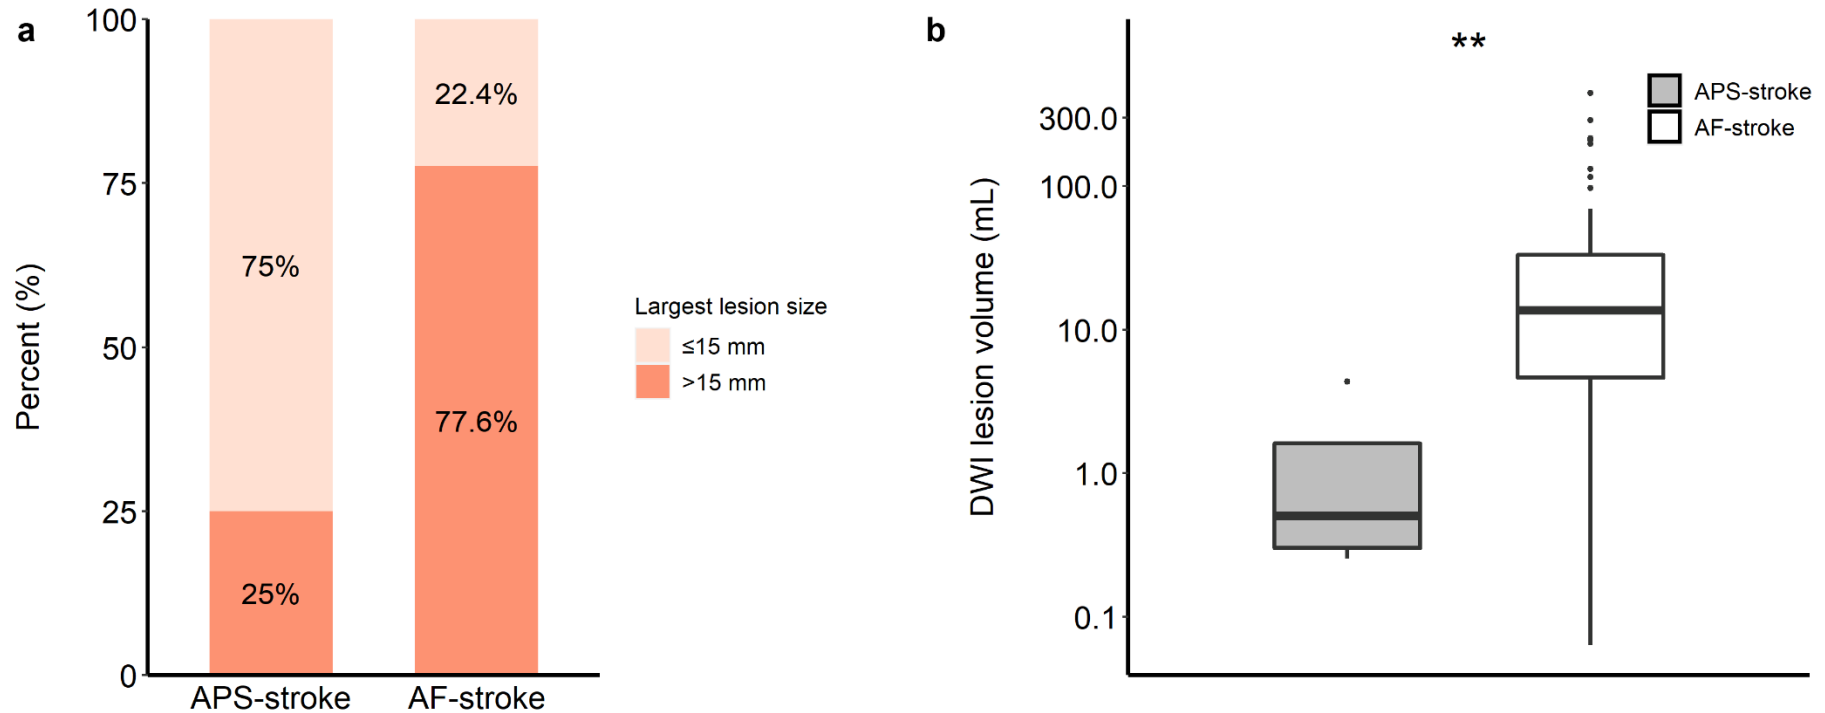

(a) Lesion pattern based on the largest lesion size ( $\leq 15$  mm or  $> 15$  mm) of definite APS- and AF-stroke patients with multi-territory lesions.

(b) Total DWI lesion volume of definite APS- and AF-stroke patients with multi-territory lesions. DWI lesion volume is presented on the y-axis as a log scale.

\*\*  $p < 0.01$ . Abbreviations: AF-stroke, atrial fibrillation-related stroke, APS-stroke, antiphospholipid syndrome-related stroke; DWI, diffusion-

weighted imaging.

**Table S3. The coexisting potential sources of stroke that were excluded from the analysis in the aPL- and AF-stroke groups.**

| <b>aPL-stroke</b>                   | <b>AF-stroke</b>                                              |
|-------------------------------------|---------------------------------------------------------------|
| Large artery atherosclerosis (n=26) | Large artery atherosclerosis (n=10)                           |
| Cardioembolic source (n=20)         | Cardioembolic source other than AF (n=200)                    |
| AF (n=10)                           | Congestive heart failure (n=42)                               |
| Left ventricular akinesia (n=5)     | Left ventricular akinesia or significant hypokinesia (n=40)   |
| Prosthetic valve (n=4)              | Prosthetic valve (n=39)                                       |
| PFO or ASD (n=4)                    | Mitral stenosis (n=26)                                        |
| Left atrial thrombus (n=1)          | Mitral valve prolapse (n=5)                                   |
| ≥2 cardioembolic sources (n=4)      | Sick sinus syndrome or complete atrioventricular block (n=25) |
| Other cause (n=28)                  | PFO or ASD (n=21)                                             |
| Cancer (n=13)                       | Dilated cardiomyopathy (n=12)                                 |
| Intra/extracranial dissection (n=5) | Hypertrophic cardiomyopathy (n=16)                            |
| Moyamoya disease (n=3)              | Left atrial thrombus (n=7)                                    |
| Procedure-related stroke (n=4)      | Cardiac amyloidosis (n=1)                                     |
| Pulmonary AVM (n=2)                 | ≥2 other cardioembolic sources (n=32)                         |
| Aortic dissection (n=1)             | Other cause (n=3)                                             |
| ≥2 sources other than aPL (n=1)     | Intra/extracranial dissection (n=1)                           |
|                                     | Moyamoya disease (n=2)                                        |
|                                     | Positive aPL (n=10)                                           |
|                                     | ≥2 sources other than AF (n=5)                                |

Abbreviations: AF, atrial fibrillation; AF-stroke, atrial fibrillation-related stroke; aPL, antiphospholipid antibody; aPL-stroke, antiphospholipid antibody-related stroke; ASD, atrial septal defect; AVM, arteriovenous malformation; PFO, patent foramen ovale.



**Figure S2. Representative examples of the diffusion-weighted imaging lesion pattern**

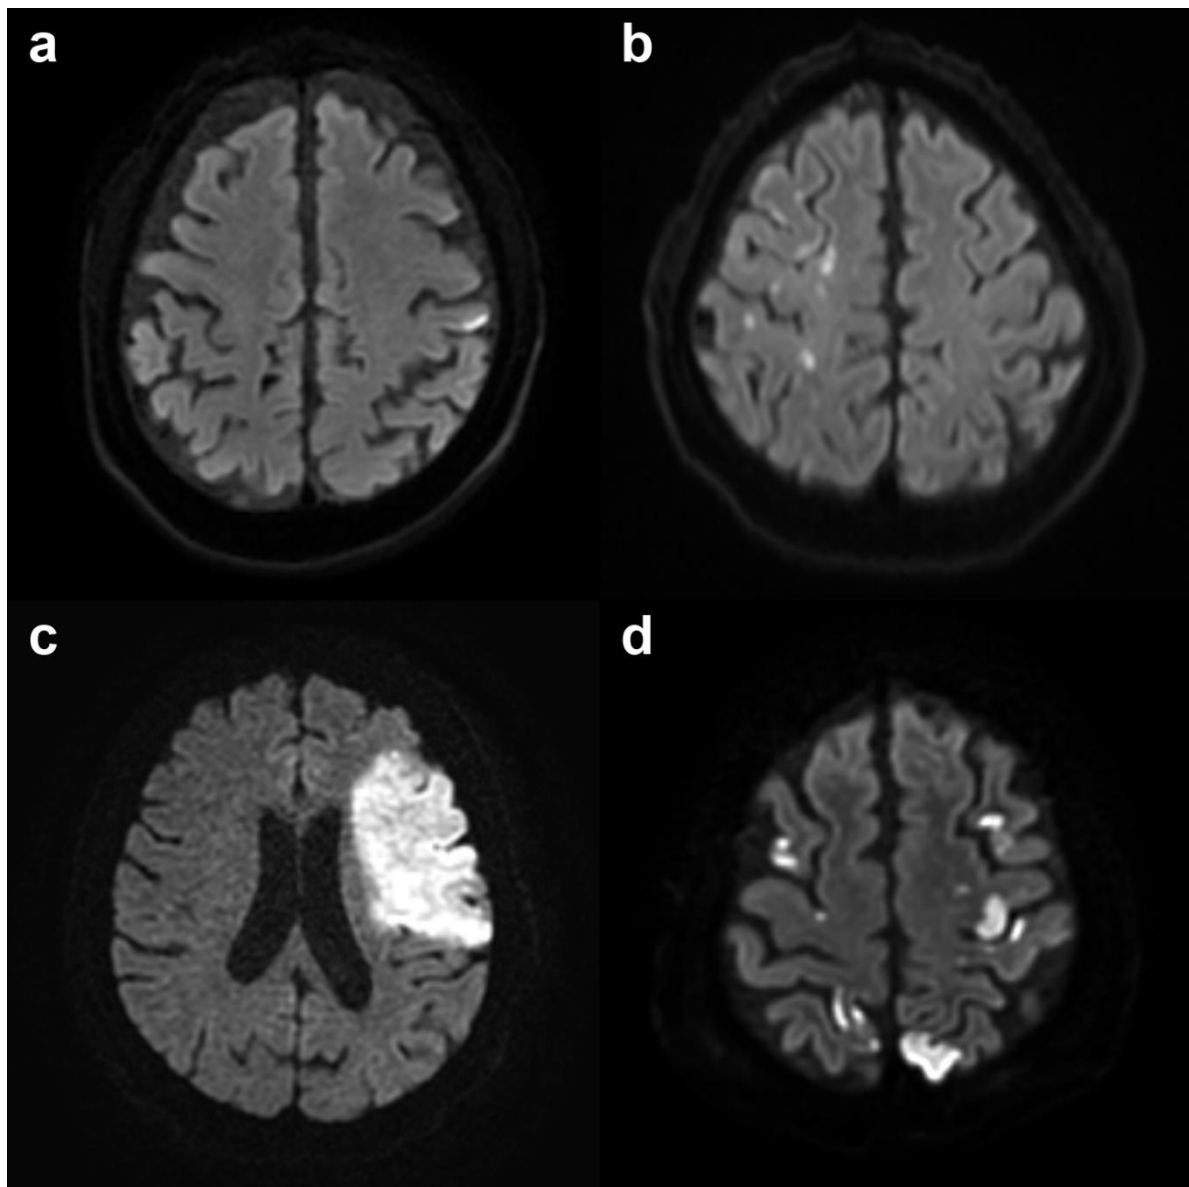

(a) Single small lesion, a solitary lesion  $\leq 15$  mm; (b) small scattered lesion in a single territory, multiple scattered lesions with the largest lesion size  $\leq 15$  mm; (c) large territorial lesion, lesion  $> 15$  mm involving a single vascular territory; and (d) multi-territory lesion, multiple lesions involving multiple vascular territories.

**Figure S3. Representative example of semiautomated segmentation of infarcted areas on diffusion-weighted imaging.**

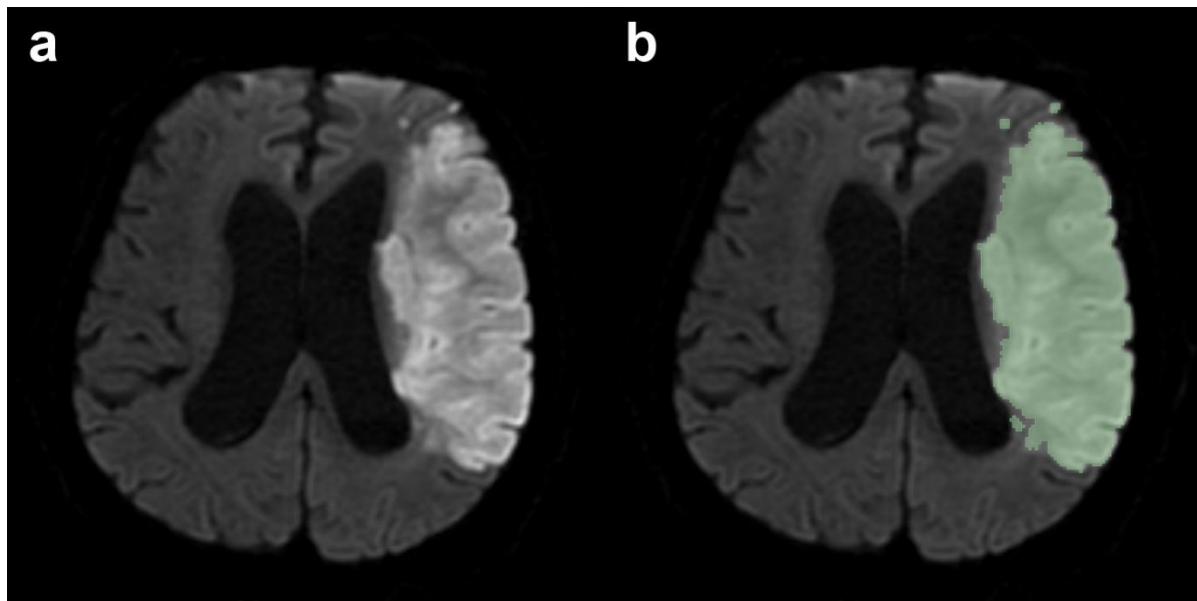

(a) The infarcted region shows a high signal intensity in the diffusion-weighted image of patients with left middle cerebral artery territory infarction. (b) The corresponding segmentation of the infarcted area for calculation of the infarct volume, based on a semiautomated method using 3D slicer software.

**Figure S4. Representative examples of patterns of relevant artery occlusion**

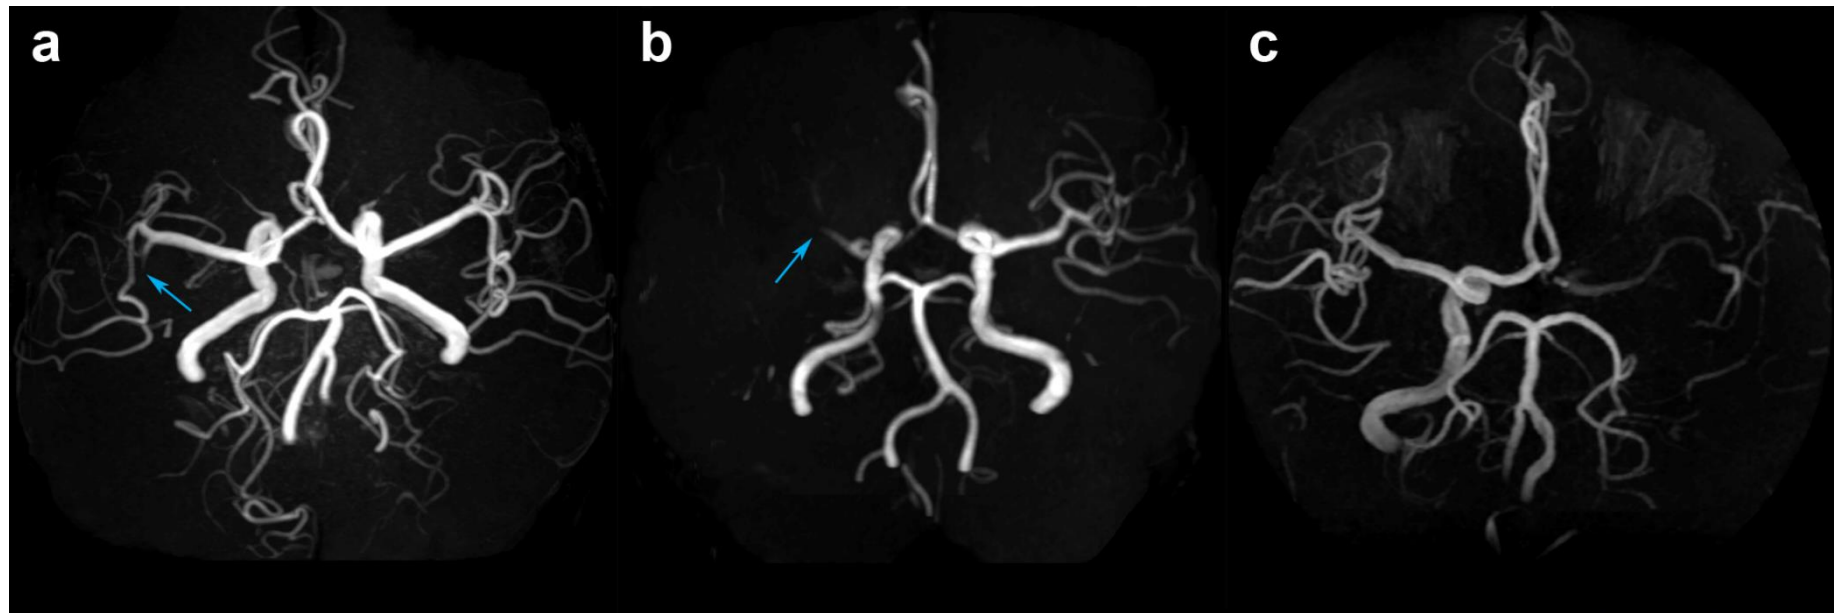

(a) Intracranial branch vessel occlusion, occlusion of the ACA, PCA, M2 or distal segments of the MCA, or SCA; (b) intracranial main vessel occlusion, occlusion of the distal ICA, M1 segment of the MCA, distal VA, or BA; and (c) extracranial large vessel occlusion, occlusion of the CCA, proximal ICA, or proximal VA.

Abbreviations: ACA, anterior cerebral artery; BA, basilar artery; CCA, common carotid artery; ICA, internal carotid artery; MCA, middle cerebral artery; PCA, posterior cerebral artery; SCA, superior cerebellar artery; VA, vertebral artery.
